# Supplementary material
Source: publisher figshare collection journal article supplement (https://asha.figshare.com/articles/dataset/_/9342503)
Supplement: Supplementary file 2 [file 1]

**Supplemental Material S1.** Military audiologists' practices.

| Topics covered with tinnitus patients              |                           | None (%)           | Some (%)              | Most/all (%)          |  |
|----------------------------------------------------|---------------------------|--------------------|-----------------------|-----------------------|--|
| Outer/middle/inner ear anatomy                     |                           | 0                  | 33                    | 67                    |  |
| Cochlea and hair cell function                     |                           | 0                  | 17                    | 83                    |  |
| Brain pathways for hearing                         |                           | 0                  | 17                    | 83                    |  |
| Mechanism of normal hearing                        |                           | 0                  | 33                    | 67                    |  |
| Relationship of tinnitus to hearing loss           |                           | 0                  | 0                     | 100                   |  |
| Causes of tinnitus                                 |                           | 0                  | 0                     | 100                   |  |
| Tinnitus in context of hearing tests               |                           | 0                  | 33                    | 67                    |  |
| Tests performed and explained to tinnitus patients | Usually not performed (%) | Do not discuss (%) | Summarize results (%) | Discuss in detail (%) |  |
| Pure tone thresholds                               | 0                         | 0                  | 33                    | 67                    |  |
| SRT                                                | 0                         | 17                 | 33                    | 50                    |  |
| Otoacoustic emissions                              | 17                        | 0                  | 33                    | 50                    |  |
| Acoustic immittance                                | 0                         | 17                 | 50                    | 33                    |  |
| Tinnitus loudness match                            | 33                        | 17                 | 33                    | 17                    |  |
| Tinnitus pitch match                               | 33                        | 17                 | 33                    | 17                    |  |
| Minimum masking level                              | 33                        | 33                 | 17                    | 17                    |  |
| Loudness discomfort level                          | 33                        | 33                 | 17                    | 17                    |  |
| Other (THI, TFI, TRQ)                              | 67                        | 0                  | 17                    | 17                    |  |

**Supplemental Material S1.** Military audiologists’ practices.

| Statements made to tinnitus patients                                   | None (%) | Some (%) | Most/all (%) |
|------------------------------------------------------------------------|----------|----------|--------------|
| Tinnitus is non-health threatening                                     | 25       | 25       | 50           |
| Tinnitus has no impact on hearing                                      | 50       | 33       | 17           |
| Tinnitus has no impact on new/<br>additional hearing loss              | 67       | 17       | 17           |
| Tinnitus is not caused by or evidence of<br>a tumor                    | 83       | 0        | 17           |
| Tinnitus is a common condition                                         | 17       | 17       | 67           |
| Your tinnitus may go away                                              | 50       | 17       | 33           |
| Your tinnitus may get worse or fluctuate                               | 17       | 50       | 33           |
| Most people learn to ignore their<br>tinnitus                          | 50       | 17       | 33           |
| The sound of each person’s tinnitus is<br>unique for that person       | 17       | 17       | 67           |
| Tinnitus is sound that arises in the inner<br>ear or auditory pathways | 33       | 0        | 67           |
| There is no known/proven medical<br>treatment for tinnitus             | 50       | 0        | 50           |

**Supplemental Material S1.** Military audiologists' practices.

Questions posed to military clinicians regarding tinnitus practice

How much detail is provided when describing the anatomy and physiology of the auditory system?

How much detail is provided when describing audiologic or other tests?

What setting and materials are used for treatment or counseling?

What reassurances do you give the patient?

What recommendations do you make?

What recommendations do you make related to sleep?

What kinds of information do you give to patients?
